# Supplementary material
Source: PubMed Central journal article supplement (PMC4288586)
Supplement: NIHMS649572-supplement-Supplemental_files.pdf [file NIHMS649572-supplement-Supplemental_files.pdf]

**Supplementary Table 1.** Primer sequence information. T7 promoter sequence is underlined.

| <b>Primer name</b> | <b>Sequence 5'-3'</b>                           |
|--------------------|-------------------------------------------------|
| intronVg1 F        | TTTGCGAACTACTCCTCCTCGCC                         |
| intronVg1 R        | TTGTAGACGTATTCGCGGTTCCGGT                       |
| intronVg2 F        | TGGTGGAAGTTTGTTCATCGTT                          |
| intronVg2 R        | ACCACCGTCCATCAACTTCTCGTA                        |
| intron2Vg1 F1      | ACGAACGTCTGGGAACTTATGCCT                        |
| intron2Vg1 R1      | ACTCGGTGTCAGCATTCTGGAAGT                        |
| intron2Vg2 F1      | TACCTTGGCCACACCGAATCGTAA                        |
| intron2Vg2 R1      | AGCAGGTTCCGGTTTCATAGTCGT                        |
| AgVg1intron1 F1    | CAACTGCGAACAACCGAACCATGA                        |
| AgVg1intron1 R1    | CACCAAATAGCCGTGCGTCACAAT                        |
| AaVgB intron1 F1   | AGCTACTGGATCTTGGTGACAGGA                        |
| AaVgB intron1 R1   | TGTAGCTGTAGCCCTGGTTGTTGT                        |
| AaVgC intron1 F2   | CCAGTGATCCAGGGAATCATGTTAG                       |
| AaVgC intron1 R2   | ATTACCAGGTAGGCACGGGTGAAA                        |
| AaVgA1intron1 F1   | ACAGCTGCCGGATACTTGAAGACA                        |
| AaVgA1intron1 R1   | TTGTAGCCAGCATCGTAGCCGTAA                        |
| rtAgVg F1          | GCCAGAAGCTGTTTGTTCGCAGA                         |
| rtAgVg R1          | GGCAGCTTCATTACCACGCAGTTT                        |
| rtAgS7 F2          | TGCACCTGGATAAGAACCAGCAGA                        |
| AgS7 R1            | AGCTGCTGCAAACCTCGGCTATTC                        |
| T7 AgUPF1 F3       | <u>TAATACGACTCACTATAGGGCATTATAGTGGGCAACCCGA</u> |
| T7 AgUPF1 R3       | <u>TAATACGACTCACTATAGGGGGATTGAGCGTATTGATGA</u>  |
| T7AgUPF1 F5        | <u>TAATACGACTCACTATAGGGGTCGACGCTTACGACGGA</u>   |

**Supplementary table 2.** Vitellogenin intron 1 and 2 lengths in base pairs (bp).

| <u>species/gene</u> | <u>intron 1</u><br><u>(bp)</u> | <u>intron 2</u><br><u>(bp)</u> |
|---------------------|--------------------------------|--------------------------------|
| CtVg1a              | 63                             | 61                             |
| CtVg1b              | 64                             | 59                             |
| CtVg2a              | 62                             | 75                             |
| CtVg2b              | 62                             | 75                             |
| AgVg1-3             | 99                             | 74                             |
| AaVgA               | 70                             | 57                             |
| AaVgB               | 82                             | 59                             |
| AaVgC               | 67                             | 68                             |

## Supplementary methods

The cycling parameters for end-point RT-PCR were 94 °C for 3 min, followed by 30 cycles of: 94 °C for 30 s, 60 °C for 30 s, 72 °C for 30 s, followed by a final extension of 72 °C for 3 minutes. The cycling parameters for quantitative PCR were 50°C for 2 min, 95°C for 15 min, followed by 40 cycles of 95°C for 15 sec, 60°C for 30 sec, 72°C for 30 sec, followed by a melt curve ramping from 72°C to 95°C at the end of the 40 cycles. *AgVg* qPCR data was quantified relative to *AgS7* using Q-Gene (1).

1. Simon, P. (2003) Q-Gene: processing quantitative real-time RT-PCR data. *Bioinformatics (Oxford, England)*, **19**, 1439–1440.

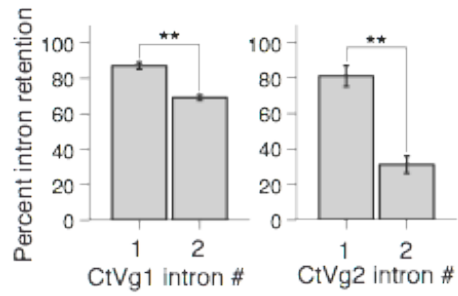

**Supplementary figure 1.** Percent retention of the first and second intron of *CtVg* genes during combined non-reproductive stages (larvae and pupae) in *C. tarsalis*. Data were quantified from RT-PCR products using intron spanning primers, *CtVg1* intron1 and intron2 (left graph) and *CtVg2* intron1 and intron2 (right graph). The bar graphs represent the mean  $\pm$ SEM. \*\* $p < 0.0001$ , Student's t test.

Translation of first exon and retained intron and second exon (partial):

*C. tarsalis* CNg1a **Met** FAKLLLLALGKY **Stop** QNHS **Stop** KNIWTNINLSNA  
CNg1b **Met** FAKLLLLALGKY **Stop** QNHSYKKHLD **Stop** HQPSKR  
CNg2a **Met** W WK FVLIVLG KLIVKI **Stop** PTYKLN **Stop** IYLFQ  
*C. tarsalis* CNg2b **Met** W WK FVLIVLG KL **Met** VK **Met** K...(36 aa)...TRS **Stop** WTV

*A. gambiae* AgVg **Met** IA K L L L L L T L G K C Y S F N R W L F H S K D F I S R A I **Stop** L I C

*A. aegypti* AaVgA **Met** L A K L L L L L A L G K C S R E C S P Q T S N T I L F F P F D F H S G A H  
C C L P I R E L V Q G L Q S W L **Stop** G L R C W  
AaVgB **Met** L T K I L L L L A L G K C S **Stop** P A S T P S A I D Q I I L C N Q F F F I V H  
AaVgC **Met** L V K L F L L A L G K F Y L H D Q A S P V S Y R I T S L F I N S G D Q Y  
C L S V L I P I R V P L W T S R **Stop** Q N

**Supplementary figure 2.** Translation of intron-retained vitellogenin transcripts from *C. tarsalis*, *A. gambiae* and *A. aegypti* reveals premature termination codons. The translation consists of the first exon (not underlined) followed by the retained first intron (underlined) and in some, partial sequences from the second exon (not underlined). “Stop” indicates a premature termination codon present due to the retention of the first intron in the sequence.

**A**

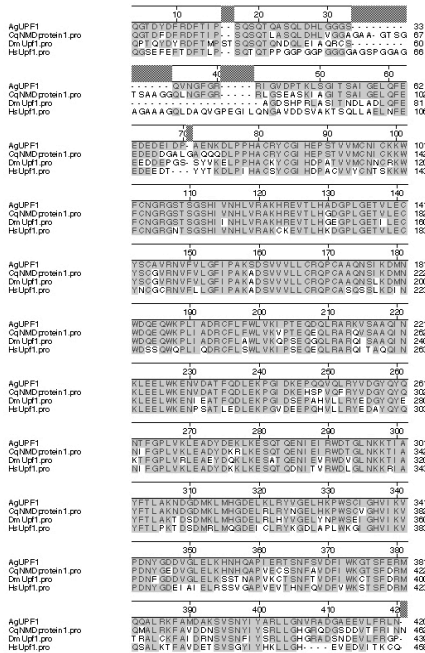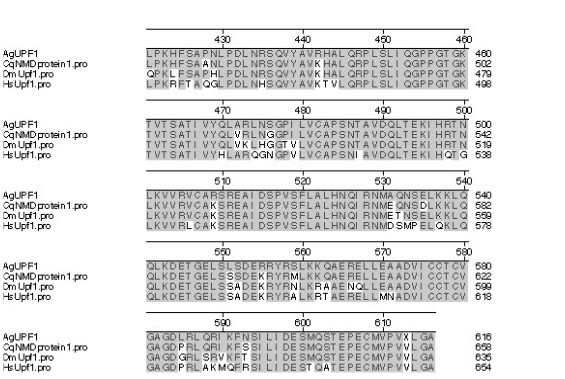

**B**

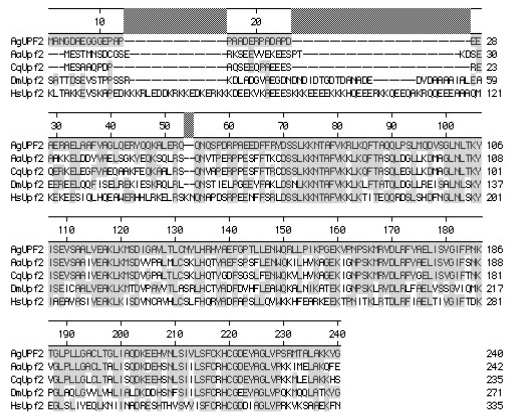

**Supplementary figure 3. A.** Partial amino acid alignment between a cloned *Anopheles gambiae* Upf1 (AgUpf1), predicted nonsense-mediated mRNA decay protein 1 from *Culex quinquefasciatus* (CqNMDprotein1, accession # XP\_001862543), *Drosophila melanogaster* Upf1 (DmUpf1, accession # NP\_572767) and *Homo sapiens* Upf1 (HsUpf1, accession # AAC51140). Shaded residues match AgUPF1. **B.** Partial amino acid alignment between a cloned sequence of *Anopheles gambiae* Upf2 (AgUpf2), predicted Upf2 from *Aedes aegypti* and *Culex quinquefasciatus* (AaUpf2 and CqUpf2, accession # XP\_001660932 and XP\_001851054), *Drosophila melanogaster* Upf2 (DmUpf2, accession # NP\_572434) and *Homo sapiens* Upf2 (HsUpf2, accession # EAW86331). Shaded residues match AgUPF2.

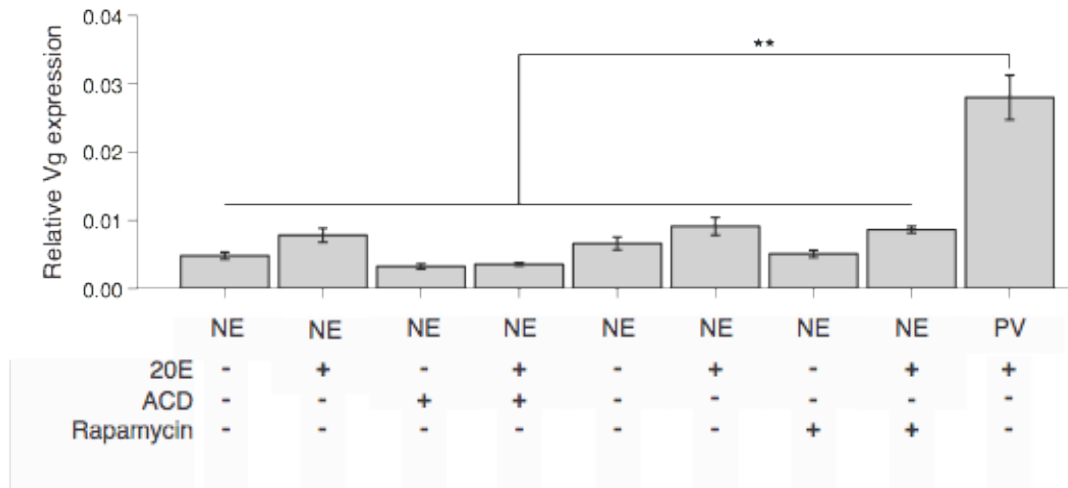

**Supplementary figure 4.** Expression of *AgVg* measured by quantitative PCR in newly emerged fat bodies treated with 20E, ACD and Rapamycin as compared to previtellogenic fat bodies treated with 20E. *AgVg* expression is shown relative to *AgS7*. The bar graphs represent the mean  $\pm$ SEM. \*\* $p < 0.0001$ . NE, newly emerged adult female; PV, previtellogenic adult female; 20E, 20-hydroxyecdysone; ACD, actinomycin D.

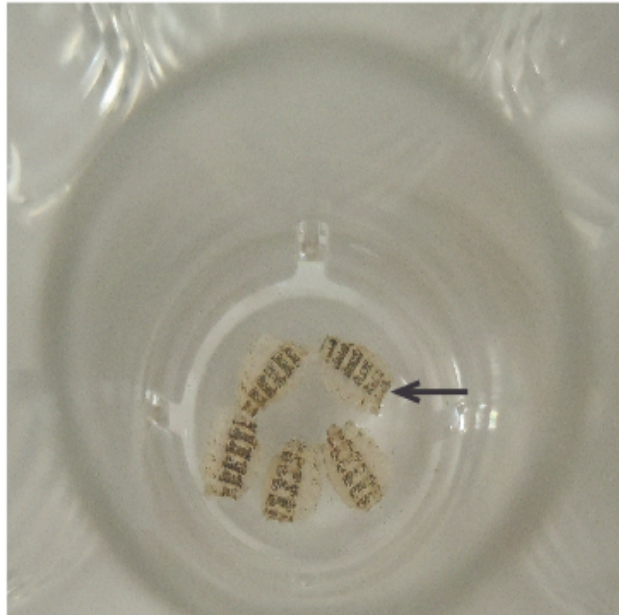

**Supplementary figure 5.** Mosquito fat body culture. The mosquito abdomen is dissected and cut on the ventral side down the anteroposterior axis. Abdomens are opened such that the cuticle is exposed to air and the fat body cells (which adhere to the wall of the abdomen) are exposed to the media. These are then referred to as “fat bodies”. Fat bodies are cultured 5 to a well of a 96-well plate as shown in the picture above. Arrow points to a single fat body.
